# Supplementary material
Source: PubMed Central journal article supplement (PMC3672846)
Supplement: NIHMS50968-supplement-1.pdf [file NIHMS50968-supplement-1.pdf]

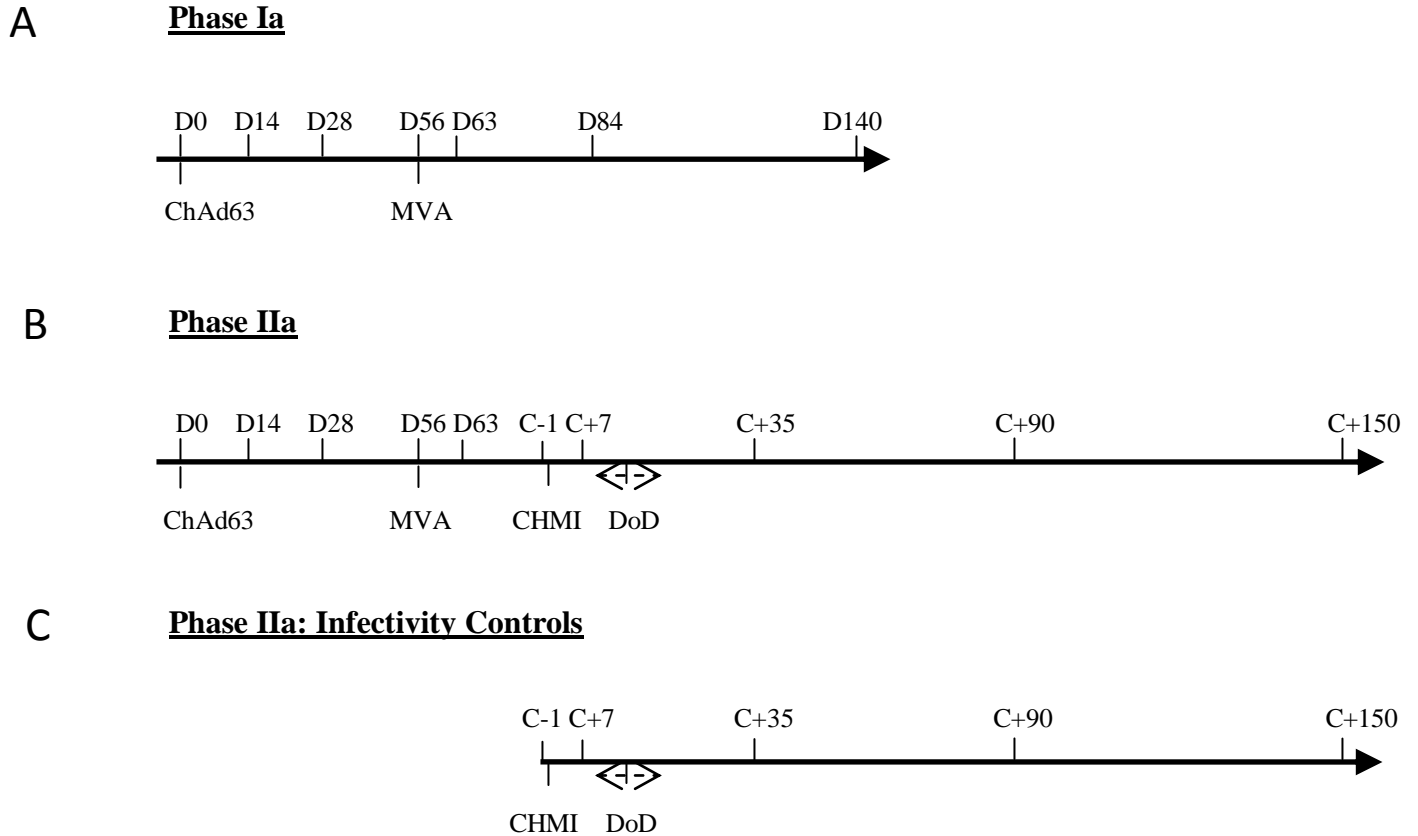

### **Supplemental Figure 1.**

#### **Vaccine Trial Timeline.**

T cell responses from key time-points within Phase Ia (**A**) and Phase IIa (**B**) clinical trials were analysed in this study. ChAd63 priming vaccination was followed 8 weeks later with MVA booster vaccination. In Phase IIa studies, controlled human malaria infection (CHMI) followed MVA booster vaccination between 2-3 weeks later. Phase IIa infectivity control volunteers (**C**) underwent CHMI without previous vaccination in parallel with Phase IIa vaccinated volunteers.

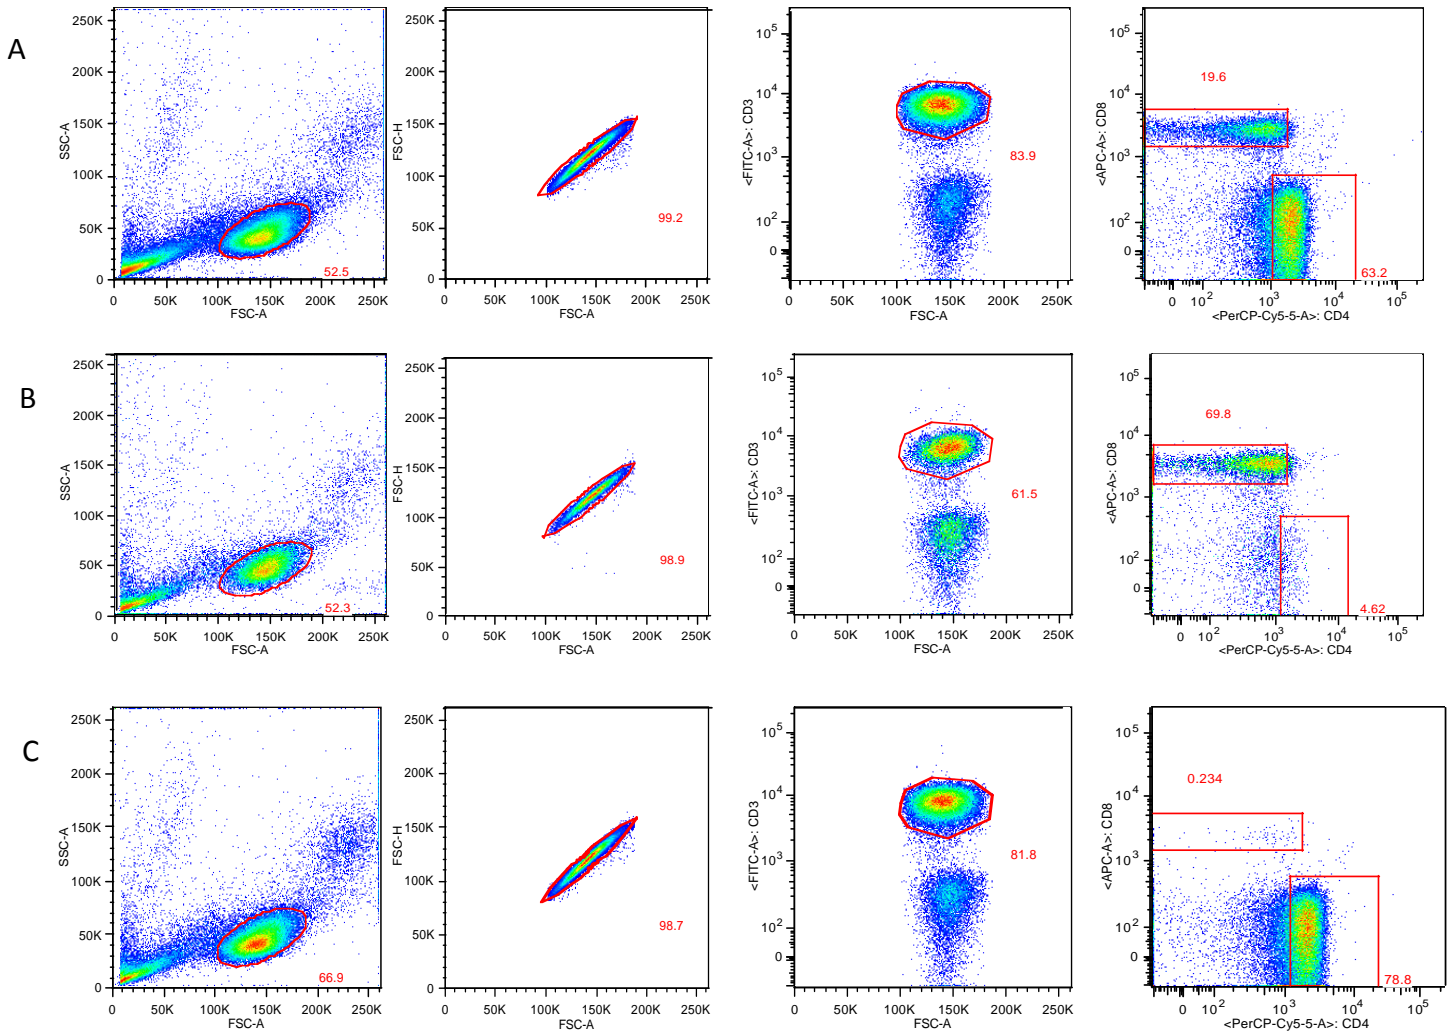

**Supplemental Figure 2.**  
**CD4<sup>+</sup> and CD8<sup>+</sup> T cell depletion efficiency.**

Cells were gated by Lymphocytes/Singlets/CD3<sup>+</sup> before gating on CD4<sup>+</sup> and CD8<sup>+</sup>, displayed left to right. **(A)** Undepleted cells, **(B)** CD8<sup>+</sup> (CD4<sup>+</sup> depleted) cells, **(C)** CD4<sup>+</sup> (CD8<sup>+</sup> depleted) cells. CD3<sup>+</sup> gates contain the following numbers of events, Undepleted (39,668), CD8<sup>+</sup> (9730), CD4<sup>+</sup> (34,229). Depletion efficiency was >98% for CD4<sup>+</sup> and >99% for CD8<sup>+</sup>. 4/14 volunteers were tested for depletion efficiency. Plots of volunteer #3 are presented and are representative of observed results.

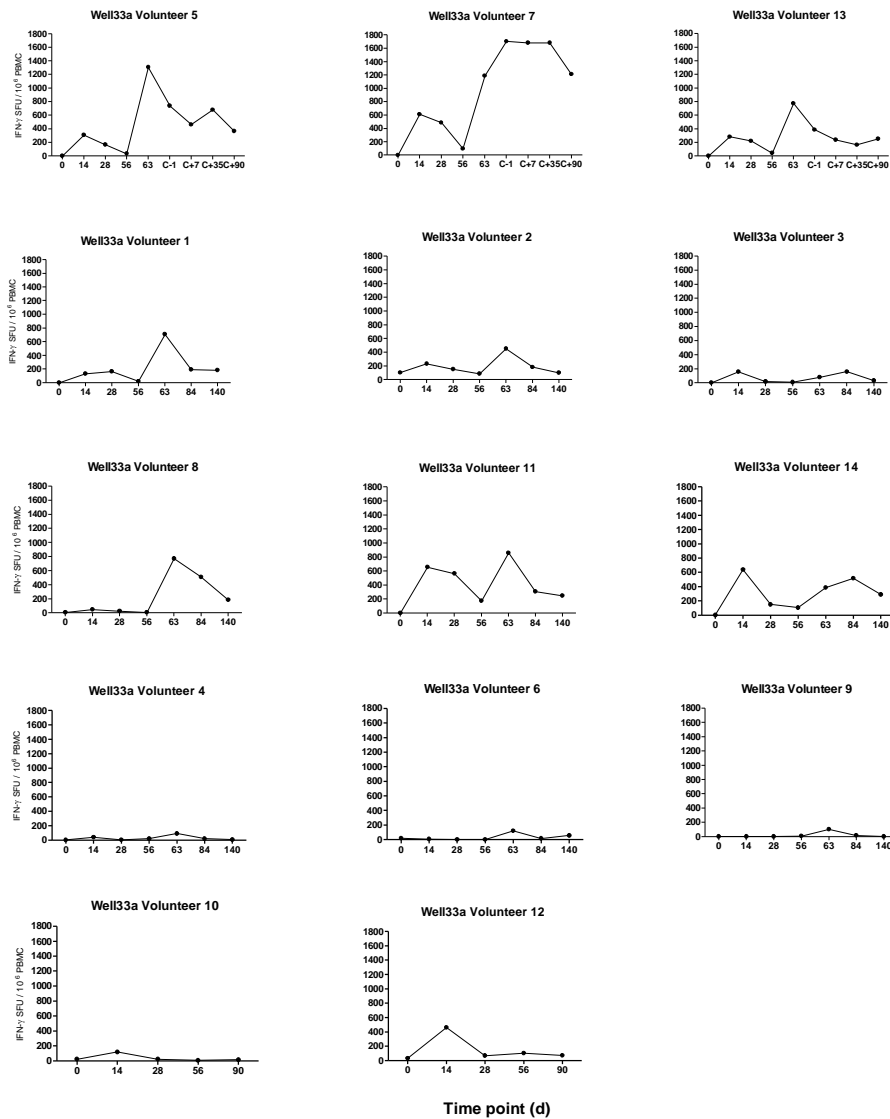

**Supplemental Figure 3.**

**Individual responses to the Well33a pool over time in primary clinical trial MSP1 ELISPOT assays.**

Graphs show total T cell IFN- $\gamma$  response to the Well33a peptide pool over time (reported as SFU per million PBMC). The Well33a pool contains 9 20mer peptides. Volunteers #5, 7 and 13 received ChAd63 prime and MVA booster vaccinations followed by CHMI. Volunteers #10 and 12 received only ChAd63 prime vaccination. All remaining volunteers received ChAd63 prime and MVA booster vaccinations.
